# Supplementary material
Source: PubMed Central journal article supplement (PMC6037051)
Supplement: glx201_suppl_supplementary_materials.pdf [file glx201_suppl_supplementary_materials.pdf]

**Supplementary Table #1. Concentrations of log(phospholipids) by cognitive status in standard deviation units, Atherosclerosis Risk in Communities (ARIC) Study, 2011 to 2013**

|                                            | <b>Normal<br/>(n = 144)</b> | <b>MCI<br/>(n = 137)</b> | <b>Dementia<br/>(n = 102)</b> |
|--------------------------------------------|-----------------------------|--------------------------|-------------------------------|
| Asymmetric dimethylarginine (ADMA)         | -5.1 (1.0)                  | -4.6 (0.9)               | -5.0 (1.2)                    |
| Hydroxybutyryl-L-carnitine [C4-OH (C3-DC)] | -7.3 (1.0)                  | -7.1 (0.9)               | -7.0 (1.1)                    |
| LysoPC a C16:1                             | 2.4 (1.1)                   | 2.6 (0.9)                | 2.6 (1.0)                     |
| Octadecanoyl-L-carnitine (C18)             | -12.1 (1.0)                 | -12.0 (1.0)              | -11.8 (1.0)                   |
| PC aa C36:5                                | 6.2 (1.0)                   | 5.9 (1.0)                | 5.8 (1.0)                     |
| PC aa C36:6                                | -0.1 (1.0)                  | -0.3 (1.0)               | -0.5 (1.0)                    |
| PC aa C38:1                                | -0.4 (0.9)                  | -0.7 (1.1)               | -0.7 (1.1)                    |
| PC aa C40:2                                | -5.1 (1.0)                  | -5.4 (0.9)               | -5.0 (1.1)                    |
| SM C26:0                                   | -7.3 (1.0)                  | -7.5 (1.1)               | -7.6 (1.0)                    |
| SM (OH) C22:1                              | 8.6 (0.9)                   | 8.3 (0.9)                | 8.1 (1.2)                     |
| SM (OH) C22:2                              | 7.4 (1.0)                   | 7.0 (1.0)                | 7.1 (1.0)                     |
| SM (OH) C24:1                              | -0.6 (1.0)                  | -0.9 (1.0)               | -1.0 (1.1)                    |
| <b>Total phospholipids</b>                 |                             |                          |                               |
| PC aa                                      | 37 (0.9)                    | 37 (1.0)                 | 38 (1.1)                      |
| PC ae                                      | 25 (0.9)                    | 25 (1.0)                 | 25 (1.0)                      |
| SM                                         | 24 (0.9)                    | 23 (0.9)                 | 23 (1.1)                      |
| SM (OH)                                    | 13 (0.9)                    | 13 (1.0)                 | 13 (1.1)                      |
| LysoPC a                                   | 20 (1.0)                    | 20 (1.0)                 | 20 (1.0)                      |

Values correspond to mean (SD) of the log transformed and standardized concentrations of the phospholipid

**Supplement Table 2. Linear regression of phospholipids (log-transformed per 1-SD difference) with grip strength, Atherosclerosis Risk in Communities (ARIC) Study, 2011 to 2013**

| Phospholipid                               | Model   | n   | $\beta$ (95% CI)     | p-value |
|--------------------------------------------|---------|-----|----------------------|---------|
| Asymmetric dimethylarginine (ADMA)         | Model 1 | 380 | -0.97 (-1.74, -0.19) | 0.02    |
|                                            | Model 2 | 380 | -0.94 (-1.68, -0.20) | 0.01    |
| Hydroxybutyryl-L-carnitine [C4-OH (C3-DC)] | Model 1 | 379 | -0.15 (-0.89, 0.59)  | 0.69    |
|                                            | Model 2 | 379 | 0.15 (-0.55, 0.85)   | 0.67    |
| LysoPC a C16:1                             | Model 1 | 380 | 0.52 (-0.31, 1.35)   | 0.22    |
|                                            | Model 2 | 380 | 0.07 (-0.87, 1.02)   | 0.15    |
| Octadecanoyl-L-carnitine (C18)             | Model 1 | 369 | -0.46 (-1.20, 0.28)  | 0.22    |
|                                            | Model 2 | 369 | -0.32 (-1.10, 0.46)  | 0.42    |
| PC aa C36:5                                | Model 1 | 380 | 0.96 (0.20, 1.72)    | 0.01    |
|                                            | Model 2 | 380 | 0.51 (-0.33, 1.36)   | 0.24    |
| PC aa C36:6                                | Model 1 | 380 | 1.27 (0.49, 2.06)    | 0.002   |
|                                            | Model 2 | 380 | 0.83 (-0.10, 1.75)   | 0.08    |
| PC aa C38:1                                | Model 1 | 380 | -0.13 (-0.87, 0.62)  | 0.73    |
|                                            | Model 2 | 380 | -0.30 (-0.97, 0.38)  | 0.50    |
| PC aa C40:2                                | Model 1 | 380 | 0.07 (-0.69, 0.83)   | 0.86    |
|                                            | Model 2 | 380 | -0.19 (-0.97, 0.59)  | 0.63    |
| SM C26:0                                   | Model 1 | 380 | 0.37 (-0.35, 1.08)   | 0.31    |
|                                            | Model 2 | 380 | 0.15 (-0.55, 0.85)   | 0.67    |
| SM (OH) C22:1                              | Model 1 | 380 | 0.98 (0.23, 1.74)    | 0.01    |
|                                            | Model 2 | 380 | 0.89 (0.00, 1.78)    | 0.05    |
| SM (OH) C22:2                              | Model 1 | 380 | 1.13 (0.32, 1.94)    | 0.006   |
|                                            | Model 2 | 380 | 1.05 (0.06, 2.05)    | 0.04    |
| SM (OH) C24:1                              | Model 1 | 380 | 1.06 (0.34, 1.79)    | 0.004   |
|                                            | Model 2 | 380 | 0.86 (0.10, 1.61)    | 0.03    |

**Model 1: Linear regression adjusted for age, sex, race, center, dementia status and mini-mental state examination**

**Model 2: Model 1 with additional adjustment for educational level, smoking and drinking status, APOE genotype, body mass index, physical activity, coronary artery disease, stroke, heart failure, diabetes mellitus, total cholesterol, high density lipoprotein (HDL) cholesterol, triglycerides, high sensitive C-reactive protein (hsCRP), systolic blood pressure, use of antihypertensive medications, use of lipid lowering medications, depressive symptoms, executive function score, bodily pain score, prevalent coronary heart disease, stroke, and heart failure weighted by selection probabilities.**

**Supplement Table 3. Linear regression of phospholipids (log-transformed per 1-SD difference) with short physical performance battery summary score, Atherosclerosis Risk in Communities (ARIC) Study, 2011 to 2013**

| Phospholipid                               | Model   | n   | $\beta$ (95% CI)     | p-value |
|--------------------------------------------|---------|-----|----------------------|---------|
| Asymmetric dimethylarginine (ADMA)         | Model 1 | 382 | -0.11 (-0.38, 0.16)  | 0.42    |
|                                            | Model 2 | 382 | 0.01 (-0.23, 0.25)   | 0.92    |
| Hydroxybutyryl-L-carnitine [C4-OH (C3-DC)] | Model 1 | 381 | -0.16 (-0.41, 0.10)  | 0.22    |
|                                            | Model 2 | 381 | -0.01 (-0.24, 0.21)  | 0.91    |
| LysoPC a C16:1                             | Model 1 | 382 | -0.10 (-0.38, 0.18)  | 0.49    |
|                                            | Model 2 | 382 | -0.35 (-0.62, -0.08) | 0.01    |
| Octadecanoyl-L-carnitine (C18)             | Model 1 | 371 | -0.25 (-0.50, 0.00)  | 0.05    |
|                                            | Model 2 | 371 | -0.15 (-0.40, 0.08)  | 0.19    |
| PC aa C36:5                                | Model 1 | 382 | 0.42 (0.15, 0.68)    | 0.002   |
|                                            | Model 2 | 382 | 0.22 (-0.04, 0.48)   | 0.09    |
| PC aa C36:6                                | Model 1 | 382 | 0.51 (0.24, 0.78)    | 0.0002  |
|                                            | Model 2 | 382 | 0.28 (-0.01, 0.56)   | 0.06    |
| PC aa C38:1                                | Model 1 | 382 | 0.17 (-0.09, 0.43)   | 0.20    |
|                                            | Model 2 | 382 | 0.09 (-0.18, 0.37)   | 0.51    |
| PC aa C40:2                                | Model 1 | 382 | 0.09 (-0.17, 0.35)   | 0.50    |
|                                            | Model 2 | 382 | -0.05 (-0.31, 0.20)  | 0.70    |
| SM C26:0                                   | Model 1 | 382 | 0.11 (-0.14, 0.36)   | 0.38    |
|                                            | Model 2 | 382 | 0.03 (-0.20, 0.26)   | 0.79    |
| SM (OH) C22:1                              | Model 1 | 382 | 0.42 (0.16, 0.68)    | 0.002   |
|                                            | Model 2 | 382 | 0.61 (0.34, 0.88)    | <0.0001 |
| SM (OH) C22:2                              | Model 1 | 382 | 0.33 (0.05, 0.61)    | 0.02    |
|                                            | Model 2 | 382 | 0.32 (0.02, 0.62)    | 0.03    |
| SM (OH) C24:1                              | Model 1 | 382 | 0.43 (0.18, 0.68)    | 0.0007  |
|                                            | Model 2 | 382 | 0.41 (0.19, 0.63)    | 0.0003  |

**Model 1: Linear regression adjusted for age, sex, race, center, dementia status and mini-mental state examination**

**Model 2: Model 1 with additional adjustment for educational level, smoking and drinking status, APOE genotype, body mass index, physical activity, coronary artery disease, stroke, heart failure, diabetes mellitus, total cholesterol, high density lipoprotein (HDL) cholesterol, triglycerides, high sensitive C-reactive protein (hsCRP), systolic blood pressure, use of antihypertensive medications, use of lipid lowering medications, depressive symptoms, executive function score, bodily pain score, prevalent coronary heart disease, stroke, and heart failure weighted by selection probabilities.**

**Supplement Table 4. Linear regression of phospholipids (log-transformed per 1-SD difference) with four meter walk speed (in m/s), Atherosclerosis Risk in Communities (ARIC) Study, 2011 to 2013**

| Phospholipid                               | Model   | n   | $\beta$ (95% CI)        | p-value |
|--------------------------------------------|---------|-----|-------------------------|---------|
| Asymmetric dimethylarginine (ADMA)         | Model 1 | 377 | -0.006 (-0.029, 0.017)  | 0.62    |
|                                            | Model 2 | 377 | 0.006 (-0.015, 0.027)   | 0.57    |
| Hydroxybutyryl-L-carnitine [C4-OH (C3-DC)] | Model 1 | 376 | -0.013 (-0.035, 0.008)  | 0.23    |
|                                            | Model 2 | 376 | 0.001 (-0.020, 0.022)   | 0.91    |
| LysoPC a C16:1                             | Model 1 | 377 | 0.001 (-0.023, 0.025)   | 0.93    |
|                                            | Model 2 | 377 | -0.025 (-0.047, -0.002) | 0.04    |
| Octadecanoyl-L-carnitine (C18)             | Model 1 | 366 | -0.020 (-0.041, 0.001)  | 0.06    |
|                                            | Model 2 | 366 | -0.020 (-0.039, -0.001) | 0.04    |
| PC aa C36:5                                | Model 1 | 377 | 0.031 (0.009, 0.053)    | 0.006   |
|                                            | Model 2 | 377 | 0.010 (-0.012, 0.032)   | 0.35    |
| PC aa C36:6                                | Model 1 | 377 | 0.039 (0.016, 0.062)    | 0.0008  |
|                                            | Model 2 | 377 | 0.016 (-0.008, 0.039)   | 0.19    |
| PC aa C38:1                                | Model 1 | 377 | 0.013 (-0.009, 0.035)   | 0.25    |
|                                            | Model 2 | 377 | 0.005 (-0.014, 0.024)   | 0.50    |
| PC aa C40:2                                | Model 1 | 377 | 0.013 (-0.009, 0.035)   | 0.23    |
|                                            | Model 2 | 377 | -0.005 (-0.029, 0.018)  | 0.66    |
| SM C26:0                                   | Model 1 | 377 | 0.013 (-0.007, 0.034)   | 0.20    |
|                                            | Model 2 | 377 | 0.003 (-0.018, 0.023)   | 0.79    |
| SM (OH) C22:1                              | Model 1 | 377 | 0.029 (0.007, 0.051)    | 0.01    |
|                                            | Model 2 | 377 | 0.035 (0.013, 0.056)    | 0.002   |
| SM (OH) C22:2                              | Model 1 | 377 | 0.027 (0.003, 0.050)    | 0.03    |
|                                            | Model 2 | 377 | 0.018 (-0.005, 0.042)   | 0.12    |
| SM (OH) C24:1                              | Model 1 | 377 | 0.035 (0.014, 0.056)    | 0.001   |
|                                            | Model 2 | 377 | 0.028 (0.008, 0.047)    | 0.005   |

**Model 1: Linear regression adjusted for age, sex, race, center, dementia status and mini-mental state examination**

**Model 2: Model 1 with additional adjustment for educational level, smoking and drinking status, APOE genotype, body mass index, physical activity, coronary artery disease, stroke, heart failure, diabetes mellitus, total cholesterol, high density lipoprotein (HDL) cholesterol, triglycerides, high sensitive C-reactive protein (hsCRP), systolic blood pressure, use of antihypertensive medications, use of lipid lowering medications, depressive symptoms, executive function score, bodily pain score, prevalent coronary heart disease, stroke, and heart failure weighted by selection probabilities.**

**Supplement Table 5. Partial correlation coefficient between phospholipid totals (log-transformed per 1-SD difference) and physical performance measurements, Atherosclerosis Risk in Communities (ARIC) Study, 2011 to 2013**

| <b>Physical Performance</b> | <b>Total Phospholipid</b> | <b>partial r2</b> | <b>p-value</b> |
|-----------------------------|---------------------------|-------------------|----------------|
| <b>Grip Strength</b>        |                           |                   |                |
|                             | PC aa                     | 0.078             | 0.15           |
|                             | PC ae                     | 0.078             | 0.15           |
|                             | SM                        | 0.101             | 0.06           |
|                             | SM (OH)                   | 0.137             | 0.01           |
|                             | LysoPC a                  | 0.035             | 0.52           |
| <b>SPPB Score</b>           |                           |                   |                |
|                             | PC aa                     | 0.015             | 0.78           |
|                             | PC ae                     | 0.004             | 0.95           |
|                             | SM                        | 0.059             | 0.27           |
|                             | SM (OH)                   | 0.162             | 0.002          |
|                             | LysoPC a                  | -0.098            | 0.07           |
| <b>4-Meter walk speed</b>   |                           |                   |                |
|                             | PC aa                     | -0.006            | 0.91           |
|                             | PC ae                     | 0.027             | 0.62           |
|                             | SM                        | 0.049             | 0.37           |
|                             | SM (OH)                   | 0.114             | 0.03           |
|                             | LysoPC a                  | -0.088            | 0.10           |

**Partial correlation coefficient controlled for age, sex, race, center, MMSE, dementia status, Model 2: Model 1 with additional adjustment for educational level, smoking and drinking status, APOE genotype, body mass index, physical activity, coronary artery disease, stroke, heart failure, diabetes mellitus, total cholesterol, high density lipoprotein (HDL) cholesterol, triglycerides, high sensitive C-reactive protein (hsCRP), systolic blood pressure, use of antihypertensive medications, use of lipid lowering medications, depressive symptoms, executive function score, bodily pain score, prevalent coronary heart disease, stroke, and heart failure weighted by selection probabilities.**

**Supplement Table 6. P-values for sex, age, and APOE interactions in the association of phospholipid totals (log-transformed per 1-SD difference) with physical performance measurements, Atherosclerosis Risk in Communities (ARIC) Study, 2011 to 2013**

| Physical Performance | Total Phospholipid | P for interaction |      |      |
|----------------------|--------------------|-------------------|------|------|
|                      |                    | Sex               | Age  | APOE |
| Grip Strength        |                    |                   |      |      |
|                      | PC aa              | 0.12              | 0.56 | 0.60 |
|                      | PC ae              | 0.16              | 0.49 | 0.28 |
|                      | SM                 | 0.28              | 0.75 | 0.06 |
|                      | SM (OH)            | 0.15              | 0.27 | 0.04 |
|                      | LysoPC a           | 0.13              | 0.51 | 0.58 |
| SPPB Score           |                    |                   |      |      |
|                      | PC aa              | 0.91              | 0.16 | 0.31 |
|                      | PC ae              | 1.00              | 0.41 | 0.51 |
|                      | SM                 | 0.26              | 0.49 | 0.40 |
|                      | SM (OH)            | 0.72              | 0.66 | 0.17 |
|                      | LysoPC a           | 0.47              | 0.11 | 0.71 |
| 4-Meter walk speed   |                    |                   |      |      |
|                      | PC aa              | 0.92              | 0.07 | 0.75 |
|                      | PC ae              | 0.57              | 0.29 | 0.73 |
|                      | SM                 | 0.83              | 0.46 | 0.72 |
|                      | SM (OH)            | 0.80              | 0.28 | 0.63 |
|                      | LysoPC a           | 0.86              | 0.52 | 0.14 |

**Model adjusted for age, sex, race, center, MMSE, dementia status, Model 2: Model 1 with additional adjustment for educational level, smoking and drinking status, APOE genotype, body mass index, physical activity, coronary artery disease, stroke, heart failure, diabetes mellitus, total cholesterol, high density lipoprotein (HDL) cholesterol, triglycerides, high sensitive C-reactive protein (hsCRP), systolic blood pressure, use of antihypertensive medications, use of lipid lowering medications, depressive symptoms, executive function score, bodily pain score, prevalent coronary heart disease, stroke, and heart failure weighted by selection probabilities.**

**Supplement Table 7. Principal component analysis of concentrations of 12 plasma metabolites**

|                     | Rotated Factor Pattern |          |          |          |          |
|---------------------|------------------------|----------|----------|----------|----------|
|                     | Factor1                | Factor2  | Factor3  | Factor4  | Factor5  |
| logADMAsd           | -0.10613               | 0.07334  | 0.01477  | 0.01696  | 0.94258  |
| logC3_DC_C4_OHsd    | -0.09888               | -0.15889 | 0.3323   | 0.71869  | 0.1305   |
| loglysoPC_a_C16_1sd | 0.09934                | 0.74806  | -0.21705 | 0.08656  | 0.25767  |
| logC18sd            | 0.11519                | 0.15619  | -0.2558  | 0.77398  | -0.08522 |
| logPC_aa_C36_5sd    | 0.18776                | 0.81986  | 0.35352  | 0.02096  | -0.09351 |
| logPC_aa_C36_6sd    | 0.26902                | 0.83561  | 0.3495   | -0.10278 | -0.04209 |
| logPC_aa_C38_1sd    | 0.17738                | 0.12268  | 0.75807  | 0.00792  | -0.12198 |
| logPC_aa_C40_2sd    | 0.30752                | 0.15767  | 0.61282  | -0.00185 | 0.18705  |
| logSM_C26_0sd       | 0.78976                | 0.07797  | 0.04025  | 0.16356  | -0.05339 |
| logSM_OH_C22_1sd    | 0.87454                | 0.20528  | 0.17144  | -0.06736 | -0.06326 |
| logSM_OH_C22_2sd    | 0.79307                | 0.21394  | 0.18234  | -0.08078 | -0.09186 |
| logSM_OH_C24_1sd    | 0.90404                | 0.08474  | 0.20051  | -0.00141 | 0.02964  |

Results from principal component analysis including the 12 phospholipids and selecting 5 factors (so all phospholipids are included in 1 factor).

These 5 factors account for 75% of the variance

**Supplement Table 8. Linear regression of principal components (Factors 1-5) with physical performance measurements, Atherosclerosis Risk in Communities (ARIC) Study, 2011 to 2013. Coefficients correspond to difference in physical function measure per 1-SD increment in principal component**

| Physical Performance | Factor   | Model   | n   | $\beta$ (95% CI)        | p-value |
|----------------------|----------|---------|-----|-------------------------|---------|
| Grip Strength        |          |         |     |                         |         |
|                      | Factor 1 | Model 1 | 369 | 0.77 (0.01, 1.52)       | 0.05    |
|                      |          | Model 2 | 369 | 0.63 (-0.21, 1.47)      | 0.14    |
|                      | Factor 2 | Model 1 | 369 | 0.91 (0.09, 1.73)       | 0.03    |
|                      |          | Model 2 | 369 | 0.41 (-0.54, 1.36)      | 0.40    |
|                      | Factor 3 | Model 1 | 369 | -0.10 (-0.87, 0.66)     | 0.79    |
|                      |          | Model 2 | 369 | -0.16 (-0.84, 0.51)     | 0.64    |
|                      | Factor 4 | Model 1 | 369 | -0.52 (-1.26, 0.22)     | 0.17    |
|                      |          | Model 2 | 369 | -0.22 (-0.94, 0.49)     | 0.54    |
|                      | Factor 5 | Model 1 | 369 | -0.85 (-1.65, -0.05)    | 0.04    |
|                      |          | Model 2 | 369 | -0.83 (-1.57, -0.08)    | 0.03    |
| SPPB Score           |          |         |     |                         |         |
|                      | Factor 1 | Model 1 | 371 | 0.26 (0.00, 0.52)       | 0.05    |
|                      |          | Model 2 | 371 | 0.32 (0.07, 0.57)       | 0.01    |
|                      | Factor 2 | Model 1 | 371 | 0.21 (-0.08, 0.49)      | 0.15    |
|                      |          | Model 2 | 371 | -0.11 (-0.38, 0.16)     | 0.41    |
|                      | Factor 3 | Model 1 | 371 | 0.21 (-0.05, 0.48)      | 0.12    |
|                      |          | Model 2 | 371 | 0.15 (-0.10, 0.40)      | 0.24    |
|                      | Factor 4 | Model 1 | 371 | -0.33 (-0.59, -0.08)    | 0.01    |
|                      |          | Model 2 | 371 | -0.18 (-0.42, 0.06)     | 0.15    |
|                      | Factor 5 | Model 1 | 371 | -0.16 (-0.44, 0.12)     | 0.27    |
|                      |          | Model 2 | 371 | -0.06 (-0.31, 0.21)     | 0.69    |
| 4-Meter walk speed   |          |         |     |                         |         |
|                      | Factor 1 | Model 1 | 366 | 0.021 (0.000, 0.043)    | 0.05    |
|                      |          | Model 2 | 366 | 0.020 (-0.001, 0.040)   | 0.06    |
|                      | Factor 2 | Model 1 | 366 | 0.016 (-0.007, 0.040)   | 0.17    |
|                      |          | Model 2 | 366 | -0.014 (-0.037, 0.009)  | 0.23    |
|                      | Factor 3 | Model 1 | 366 | 0.012 (-0.010, 0.035)   | 0.27    |
|                      |          | Model 2 | 366 | 0.008 (-0.011, 0.028)   | 0.39    |
|                      | Factor 4 | Model 1 | 366 | -0.027 (-0.048, -0.005) | 0.01    |
|                      |          | Model 2 | 366 | -0.019 (-0.039, 0.003)  | 0.08    |
|                      | Factor 5 | Model 1 | 366 | -0.004 (-0.027, 0.019)  | 0.71    |
|                      |          | Model 2 | 366 | 0.005 (-0.016, 0.026)   | 0.65    |

**Model 1: Linear regression adjusted for age, sex, race, center, dementia status and mini-mental state examination**



**Model 2: Model 1 with additional adjustment for educational level, smoking and drinking status, APOE genotype, body mass index, physical activity, coronary artery disease, stroke, heart failure, diabetes mellitus, total cholesterol, high density lipoprotein (HDL) cholesterol, triglycerides, high sensitive C-reactive protein (hsCRP), systolic blood pressure, use of antihypertensive medications, use of lipid lowering medications, depressive symptoms, executive function score, bodily pain score, prevalent coronary heart disease, stroke, and heart failure weighted by selection probabilities.**

**Supplement Table 9. Logistic regression of phospholipid totals (log-transformed per 1-SD difference) with low levels of physical performance measurements, Atherosclerosis Risk in Communities (ARIC) Study, 2011 to 2013**

| Physical Performance                            | Total Phospholipid | Model   | n   | OR (95% CI)       | p-value |
|-------------------------------------------------|--------------------|---------|-----|-------------------|---------|
| SPPB Score ≤6<br>(78 of 382, 20%)               | PC aa              | Model 1 | 382 | 0.93 (0.70, 1.24) | 0.61    |
|                                                 |                    | Model 2 | 382 | 0.98 (0.52, 1.86) | 0.96    |
|                                                 | PC ae              | Model 1 | 382 | 0.80 (0.60, 1.07) | 0.14    |
|                                                 |                    | Model 2 | 382 | 0.77 (0.43, 1.36) | 0.36    |
|                                                 | SM                 | Model 1 | 382 | 0.86 (0.63, 1.16) | 0.31    |
|                                                 |                    | Model 2 | 382 | 0.84 (0.48, 1.46) | 0.54    |
|                                                 | SM (OH)            | Model 1 | 382 | 0.66 (0.49, 0.89) | 0.007   |
|                                                 |                    | Model 2 | 382 | 0.50 (0.30, 0.83) | 0.008   |
|                                                 | LysoPC a           | Model 1 | 382 | 1.09 (0.81, 1.46) | 0.56    |
|                                                 |                    | Model 2 | 382 | 1.47 (1.04, 2.07) | 0.03    |
| 4-Meter walk speed ≤0.6 m/s<br>(48 of 377, 13%) | PC aa              | Model 1 | 377 | 1.04 (0.74, 1.47) | 0.83    |
|                                                 |                    | Model 2 | 377 | 1.10 (0.45, 2.70) | 0.84    |
|                                                 | PC ae              | Model 1 | 377 | 0.93 (0.66, 1.31) | 0.67    |
|                                                 |                    | Model 2 | 377 | 1.02 (0.45, 2.31) | 0.96    |
|                                                 | SM                 | Model 1 | 377 | 0.81 (0.56, 1.16) | 0.25    |
|                                                 |                    | Model 2 | 377 | 0.53 (0.22, 1.29) | 0.16    |
|                                                 | SM (OH)            | Model 1 | 377 | 0.70 (0.50, 1.00) | 0.05    |
|                                                 |                    | Model 2 | 377 | 0.63 (0.33, 1.21) | 0.16    |
|                                                 | LysoPC a           | Model 1 | 377 | 1.40 (0.98, 2.01) | 0.06    |
|                                                 |                    | Model 2 | 377 | 2.10 (1.24, 3.56) | 0.006   |

**Model 1: Linear regression adjusted for age, sex, race, dementia status and mini-mental state examination**

**Model 2: Model 1 with additional adjustment for educational level, smoking and drinking status, APOE genotype, body mass index, physical activity, coronary artery disease, stroke, heart failure, diabetes mellitus, total cholesterol, high density lipoprotein (HDL) cholesterol, triglycerides, high sensitive C-reactive protein (hsCRP), systolic blood pressure, use of antihypertensive medications, use of lipid lowering medications, depressive symptoms, executive function score, bodily pain score, prevalent coronary heart disease, stroke, and heart failure weighted by selection probabilities.**
